# Supplementary material for: Paper-based DNA sensor enabling colorimetric assay integrated with smartphone for human papillomavirus detection
Source: Royal Society of Chemistry journal article supplement (doi:10.1039/d1nj00417d), 2021-01-01
Supplement: d1nj00417d1.pdf [file d1nj00417d1.pdf]

1  
2  
3  
4 **SUPPLEMENTARY INFORMATION**

5 **Paper-based DNA Sensor enabling Colorimetric Assay Integrated with Smartphone for Human Papillomavirus**

6 **Detection**

7 Sarida Naorungroj<sup>a</sup>, Prinjaporn Teengam<sup>a</sup>, Tirayut Vilaivan<sup>b\*</sup>, Orawon Chailapakul<sup>c,3\*\*</sup>

8 <sup>a</sup>*Electrochemistry and Optical Spectroscopy Center of Excellence (EOSCE), Department of Chemistry, Faculty of*  
9 *Science, Chulalongkorn University, 254 Phayathai Road, Pathumwan, Bangkok 10330, Thailand*

10 <sup>b</sup>*Organic Synthesis Research Unit, Department of Chemistry, Faculty of Science, Chulalongkorn University,*  
11 *Phayathai Road, Patumwan, Bangkok 10330, Thailand*

12 <sup>c</sup>*Center of Excellence on Petrochemical and Materials Technology, Chulalongkorn University, Pathumwan,*  
13 *Bangkok 10330, Thailand*

14  
15 \*\*Corresponding author. Prof. Dr. Orawon Chailapakul

16 Email: corawon@chula.ac.th

17  
18 \*Co-corresponding author. Prof. Dr. Tirayut Vilaivan

19 Email: vtirayut@chula.ac.th

20  
21  
22

23 1. Synthesis of acpcPNA probe for HPV type 16

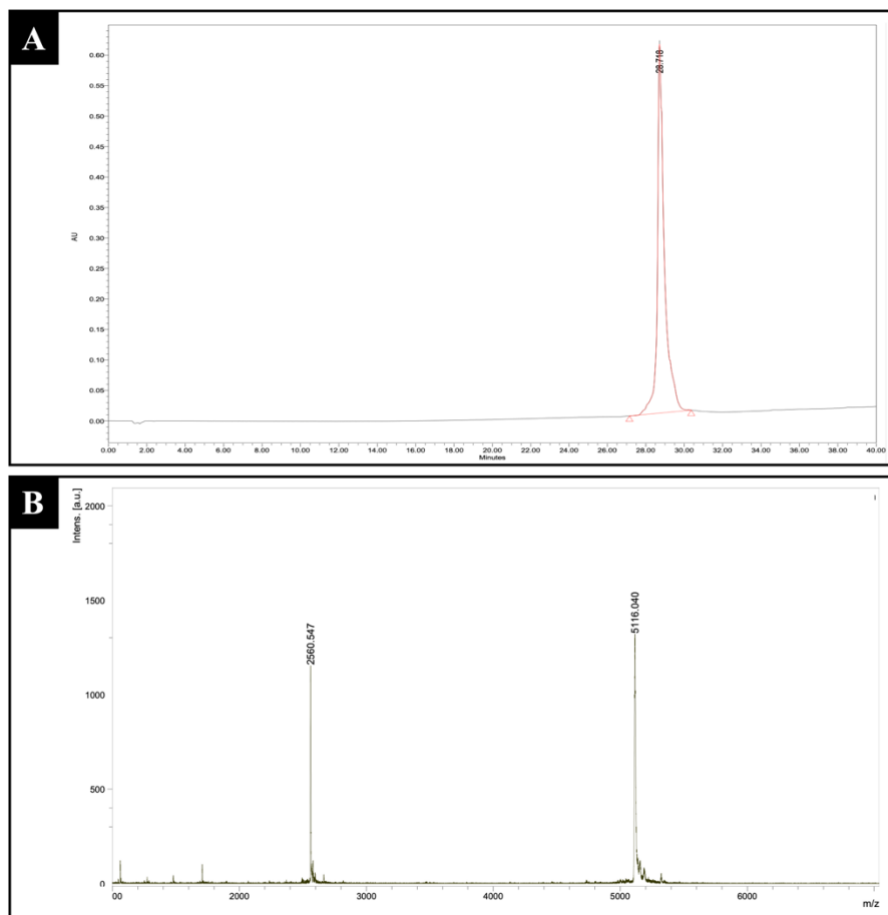

24  
25 Fig. S1 (A) HPLC chromatogram and (B) MALDI-TOF mass spectrum of Bz-CATACACCTCCAGC-Lys<sub>3</sub>-NH<sub>2</sub>

26

27 2. Gadget camera structure and color intensity analyzing application

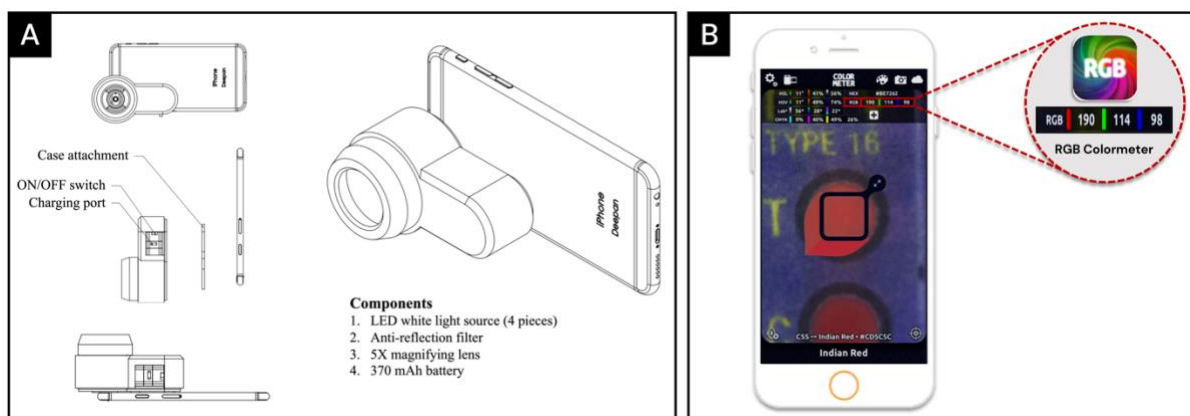

28  
29 Fig. S2 (A) Structure of the home-made gadget camera coupled with smartphone readout device and its  
30 components designed by EOSCE group (B) Image of color intensity analyzing by using RGB Colorimeter  
31 application

32

33 **3. Colorimetric detection of HPV DNA based on acpcPNA-induced d-AuNPs aggregation (proof-of-**  
34 **concept experiments)**

35 The proof-of-concept experiment for this work was demonstrated as shown in Table S1. The color of d-  
36 AuNPs remained red when adding complementary DNA. In contrast, when the d-AuNPs solution was dropped  
37 onto the paper that was pre-deposited with the acpcPNA probe, the color turned to purple due to the  
38 aggregation of d-AuNPs. In the presence of the complementary DNA, the hybridization of DNA and acpcPNA  
39 probe occurred and the color remained red due to the depletion of free acpcPNA probe that can induce d-AuNPs  
40 aggregation.

41

42 **Table S1** List of d-AuNPs conditions and their photographs

| d-AuNPs in various conditions               | Photographs                                                                           |
|---------------------------------------------|---------------------------------------------------------------------------------------|
| d-AuNPs                                     |  |
| d-AuNPs + complementary DNA                 |  |
| d-AuNPs + acpcPNA probe                     |  |
| d-AuNPs + acpcPNA probe + complementary DNA |  |

43

44 Next, the images of the d-AuNP solution on the paper were taken via a smartphone coupled with a  
45 home-made camera gadget for light control. Then, they were imported to the RGB Colorimeter application for  
46 measuring the color intensity. To interpret the results, the intensity in the red channel was used to quantitate  
47 the “redness” of the reaction. When the solution is redder, a larger numerical value is obtained in the red  
48 channel. When the solution turns purple, the red value in the red channel decreases.

49 Fig. S3 showed the color intensity of the d-AuNPs solution on the paper under each condition. All three  
50 channels (red, green, and blue) were compared. The d-AuNPs and the complementary DNA (d-AuNPs +DNA)  
51 provide the same color intensity as free d-AuNPs in the red channel indicating that the aggregation process is  
52 not affected by the negatively charged DNA. On the other hand, the aggregation of the d-AuNPs readily occurred

53 since the electrostatic repulsion was shielded when the positively charged acpcPNA probe was introduced into  
54 the d-AuNPs solution (d-AuNPs+acpcPNA). The color of the solution changed to purple, thus resulting in a  
55 decreased color intensity in the red channel. When the complementary DNA was also present in the system, the  
56 hybridization of the target DNA with the acpcPNA probe inhibited the aggregation of the d-AuNPs induced by  
57 the acpcPNA probe, thus the solution became redder. The red color intensity (d-AuNPs+acpcPNA+DNA)  
58 increased with the increasing of complementary DNA (d-AuNPs+acpcPNA). A small intensity change was also  
59 observed in the green channel, but not the blue channel. However, the intensity change in the red channel was  
60 the most obvious and was therefore chosen for the next experiments.

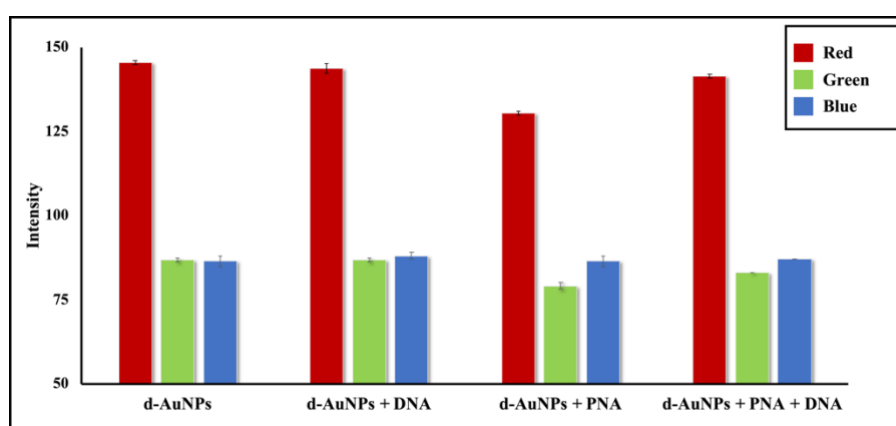

61  
62  
63 **Fig. S3** Color intensity of d-AuNPs in various condition measuring by RGB Colorimeter application in red, green,  
64 and blue channel

65  
66 To confirm the performance of the acpcPNA-induced d-AuNPs aggregation, d-AuNPs under various  
67 conditions were characterized. Firstly, the color change of the d-AuNPs which related to the d-AuNPs  
68 aggregation state was characterized by UV-vis absorption spectrophotometry in the solution phase. Fig. S4  
69 shows the UV-vis absorption spectra of d-AuNPs under various conditions as shown in Table S2. The solution of  
70 d-AuNPs (red line) provides an absorption peak at 522 nm which was in good agreement with the previous work  
71 [1]. After adding complementary DNA (blue line), the peak at 522 nm which was similar to the peak of d-AuNPs  
72 was still present. This indicated that the complementary DNA did not affect the d-AuNPs aggregation state. In  
73 contrast, when the acpcPNA probe was added (purple line), the solution turned purple and the peak red-shifted  
74 to 552 nm due to the aggregation of d-AuNPs. When both the acpcPNA probe and its complementary DNA target  
75 were present in the d-AuNPs solution, a slight red-shifting of the absorption peak (at 526 nm) was also observed,  
76 and the solution remained red. This result indicated that some of the acpcPNA probes hybridized with the

77 complementary DNA, leading to lower amounts of the acpcPNA probe that can induce the d-AuNPs aggregation,  
78 resulting in a mixture of dispersed and aggregated forms of the d-AuNPs.

79

80 **Table S2** List of reaction components in the UV-vis absorption spectrophotometry studies

| Reagents                  | Concentration                             |
|---------------------------|-------------------------------------------|
| d-AuNPs                   | 10-fold diluted stock using Milli Q water |
| complementary DNA (C-DNA) | 0, 50 $\mu$ M                             |
| acpcPNA probe             | 0, 50 $\mu$ M                             |

81

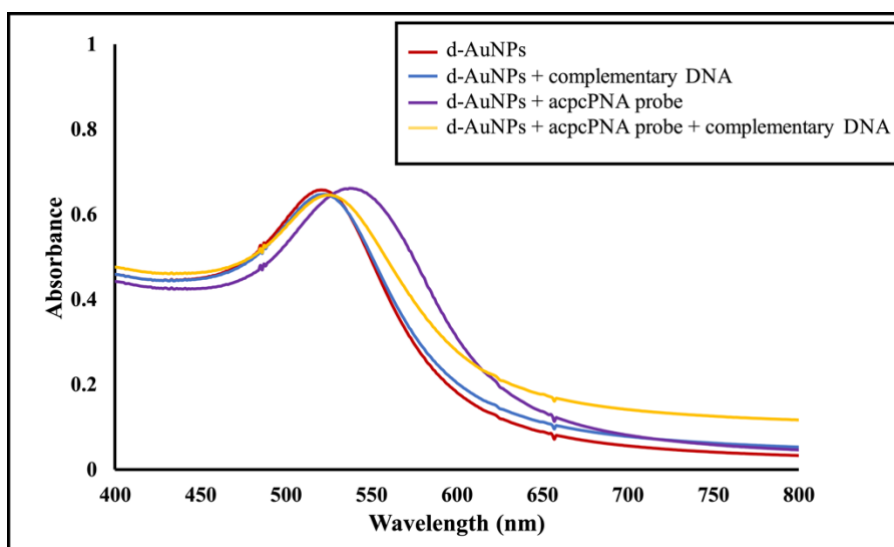

82

83 **Fig. S4** UV-vis absorption spectra of d-AuNPs with different condition

84

85 Moreover, the dispersion and morphology of the d-AuNPs under each condition were investigated  
86 using transmission electron microscopy (TEM). Fig. S5 shows the TEM images of the d-AuNPs under different  
87 conditions. The morphology of the d-AuNPs (Fig. S5A) is spherical with the particle size of 17 nm. In the  
88 presence of the complementary DNA, the particle size remained the same as shown in Fig. S5B. After  
89 adding the acpcPNA probe, the particle size of the d-AuNPs increased due to aggregation of the d-AuNPs (Fig.  
90 S5C). The results indicated that the acpcPNA probe could induce the d-AuNPs aggregation while DNA could not.

91 In addition, the particle size of the d-AuNPs in the presence of both the acpcPNA probe and the complementary  
92 DNA target was investigated. Fig. S5D shows the mixture of small and large particles due to the presence of the  
93 d-AuNPs in both dispersion form and aggregation form. The results from the TEM technique were consistent  
94 with the UV-vis absorption spectrophotometry.

95

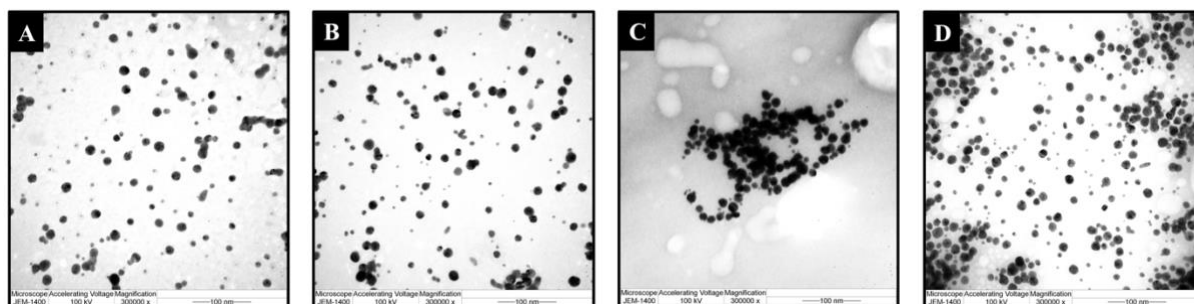

96

97 **Fig. S5** TEM images of (A) d-AuNPs, (B) d-AuNPs +DNA, (C) d-AuNPs + acpcPNA and (D) d-AuNPs + acpcPNA +  
98 DNA

99

#### 100 4. Optimization parameters

101 To find the optimal conditions for the assay, key experimental parameters including the d-AuNPs to  
102 buffer (0.01 M PBS, pH 7.4) ratio, the PBS mixing time, the acpcPNA probe concentration, and the incubation  
103 time were studied. The details of the optimization conditions are shown in Figure S6. In Fig. S6A, the color  
104 intensity in the red channel increased until the ratio of d-AuNPs:PBS reached 10:4 and tended to be stable after  
105 this point. This result indicated that beyond the ratio of d-AuNPs:PBS at 10:4, salts in the PBS solution did not  
106 affect the d-AuNPs aggregation. Hence, the ratio of 10:4 d-AuNPs:PBS was chosen for further experiments. Next,  
107 the effect of the mixing time of d-AuNPs and PBS buffer was evaluated. The color intensity of the d-AuNPs and  
108 PBS buffer mixture did not change when the mixing time was increased as shown in Fig. S6B. Therefore, the d-  
109 AuNPs and PBS buffer mixing time did not affect the d-AuNPs aggregation. Next, the effect of the acpcPNA probe  
110 concentration was investigated. We compromised between the acpcPNA concentration and volume to obtain  
111 the highest intensity which means the highest degree of aggregation. The acpcPNA probe concentration and  
112 volume were varied within a range of 1 to 50  $\mu$ M and 2 to 5  $\mu$ L, respectively. The differential color intensity ( $\Delta$   
113 intensity) was obtained from the intensity of d-AuNPs before and after the addition of the acpcPNA probe ( $\Delta$   
114 intensity = intensity<sub>without acpcPNA probe</sub> – intensity<sub>with acpcPNA probe</sub>). The highest  $\Delta$  intensity was observed at the

115 concentration of 50  $\mu\text{M}$  and the volume of 3  $\mu\text{L}$  and tended to be stable beyond this volume as shown in Fig.  
 116 S6C. Therefore, 50  $\mu\text{M}$  acpcPNA probe solution (3  $\mu\text{L}$ ) was selected as the optimal condition. Furthermore, the  
 117 effect of incubation time in the presence of target DNA was next investigated. For this parameter, the differential  
 118 color intensity ( $\Delta$  intensity) obtained from the color intensity of d-AuNPs before and after the addition of the  
 119 target DNA ( $\Delta$  intensity = intensity<sub>with target DNA</sub> – intensity<sub>without target DNA</sub>) decreased with the increase of incubation  
 120 time and was constant after 15 min as shown in Fig. S6D. This result indicated that the reactions completely  
 121 occurred after this incubation time. Therefore, 20 min of incubation time was employed for further experiments.  
 122

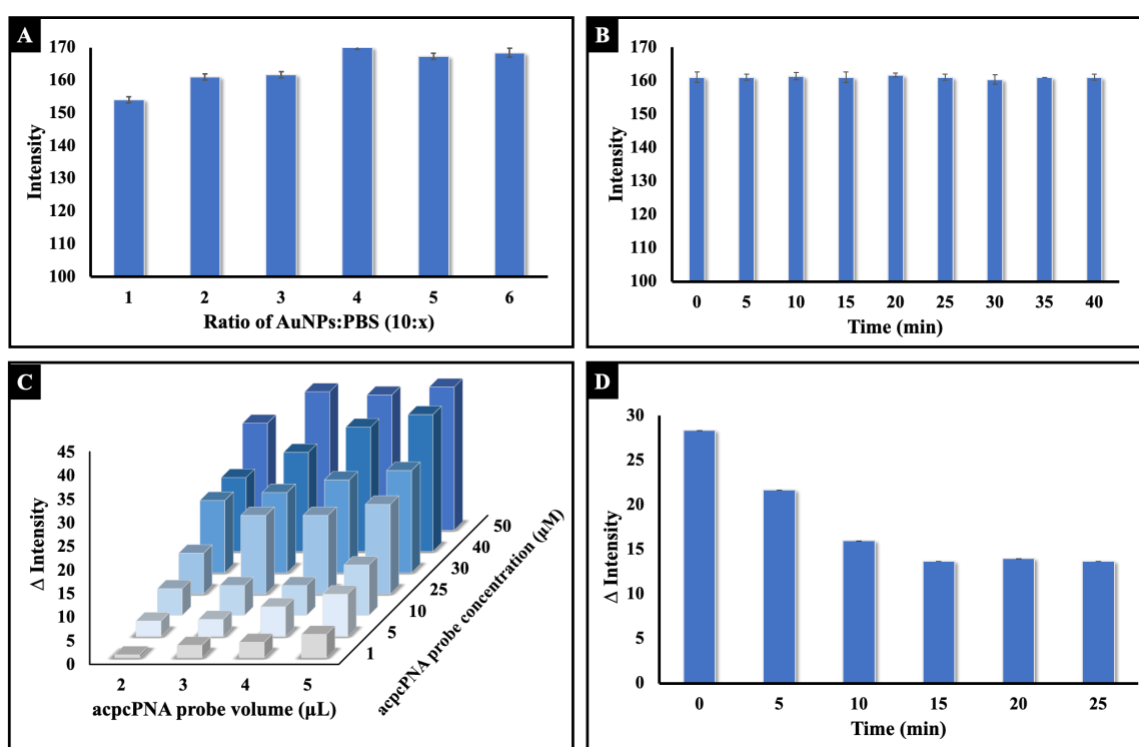

123  
 124 **Fig. S6** Optimization of (A) d-AuNPs:PBS buffer ratio, (B) d-AuNPs and PBS mixing time, (C) acpcPNA probe  
 125 concentration and (D) incubation time. The error bars showed one standard deviation (SD) obtained from three  
 126 independent measurements (n=3).

127

## 128 5. Analytical performance in the absence of $\text{MgCl}_2$

129 The analytical performance of the proposed colorimetric DNA sensor was next evaluated using the  
 130 paper-based sensors pre-deposited with the acpcPNA probe (50  $\mu\text{M}$ , 3  $\mu\text{L}$ ). Under the optimal conditions, the  
 131 photographic results of the proposed colorimetric DNA sensor (Fig. S7A), and a linear correlation between the

132  $\Delta$  Intensity and logarithmic DNA concentration in the range of 1 to 100  $\mu\text{M}$  was observed (Fig. S7B, inset) with a  
133 correlation coefficient ( $R^2$ ) of 0.9959. The experimental limit of detection (LOD) was found to be 1  $\mu\text{M}$ .

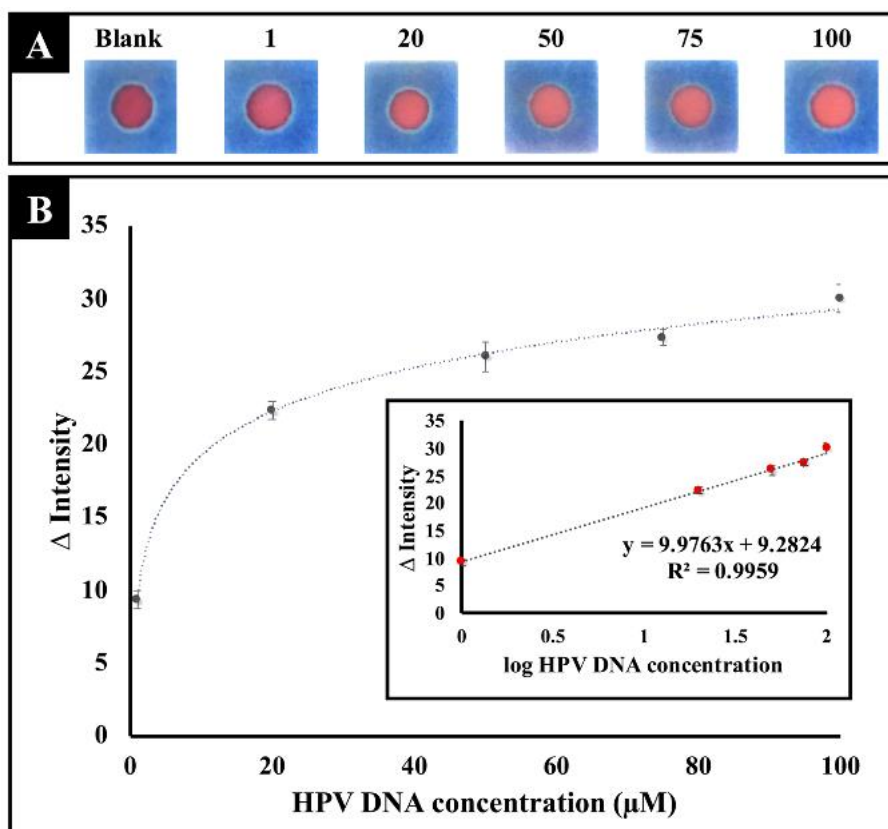

134  
135 **Fig. S7** (A) Photographic results of the proposed sensor with HPV DNA concentration in the range of 1-100  $\mu\text{M}$ .  
136 (B) Calibration plot between  $\Delta$  Intensity vs DNA concentration and calibration plot between  $\Delta$  intensity and log  
137 DNA concentration (inset) for HPV DNA detection. The error bars showed one standard deviation (SD) provided  
138 from three independent measurements ( $n=3$ ).

139

140



141 6. Destabilizing of d-AuNPs by salt-induced aggregation

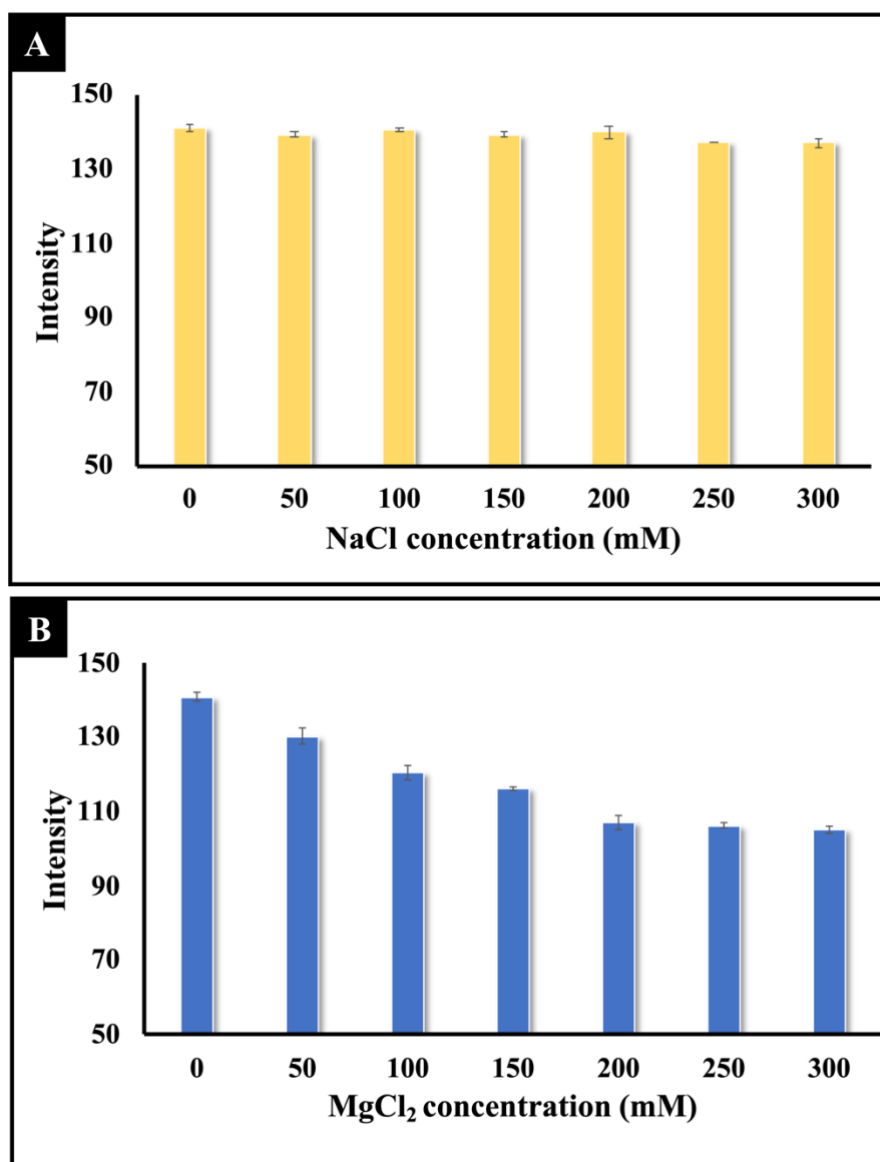

142  
143 **Fig. S8** The effect of salt-induced aggregation of d-AuNPs (A) NaCl and (B) MgCl<sub>2</sub> without apcPNA probe. The  
144 error bars show one standard deviation (SD) provided from three independent measurements (n=3).

145

146

147 7. Stability and reproducibility studies

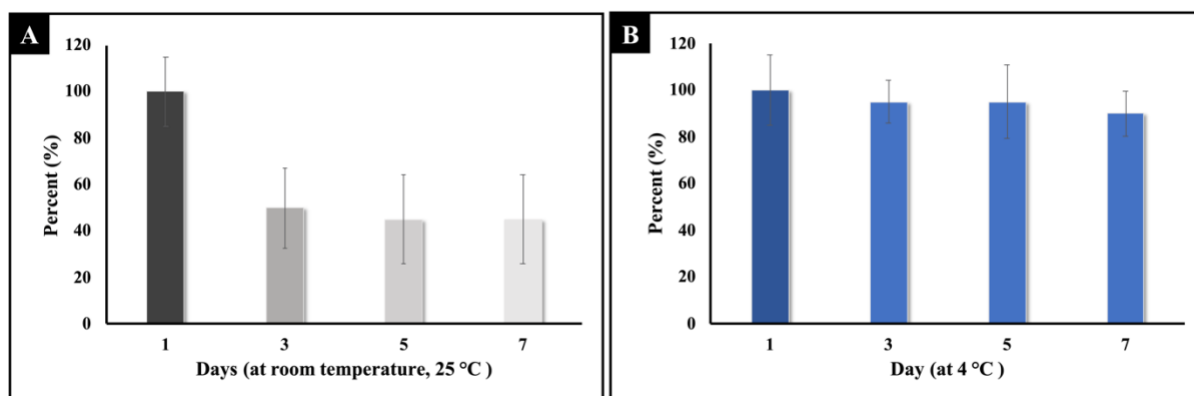

148  
149 **Fig. S9** Storage lifetime of the proposed colorimetric HPV DNA sensor at (A) room temperature (25°C) and (B)  
150 4 °C. The error bars show one standard deviation (SD) provided from three independent measurements (n=3).

151

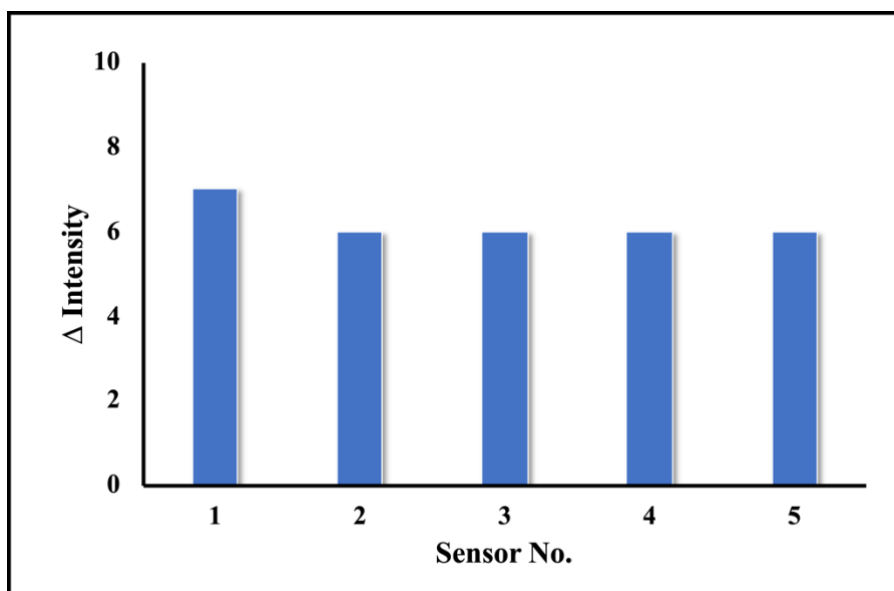

152  
153 **Fig. S10** Reproducibility of the five independently prepared sensors.

154

155

## 8. Comparison with other DNA-based HPV detection methods

**Table S3** Comparison of the proposed DNA sensor with other HPV DNA detection methods

| References       | Analytical method  | Format       | Type of probe  | Instrument                             | Linear range     | LOD         |
|------------------|--------------------|--------------|----------------|----------------------------------------|------------------|-------------|
| [2]              | Fluorometry        | Solution     | DNA            | Microplate reader                      | 0.05-200 $\mu$ M | 100 pM      |
| [3]              | Colorimetry        | Paper        | acpcPNA        | Scanner + imageJ                       | 20–2500 nM       | 1 nM        |
| [4]              | Electrochemistry   | Paper        | acpcPNA        | Potentiostat                           | 0.5–100 nM       | 150 pM      |
| <b>This work</b> | <b>Colorimetry</b> | <b>Paper</b> | <b>acpcPNA</b> | <b>Smartphone + RGB<br/>colormeter</b> | <b>1-1000 nM</b> | <b>1 nM</b> |

## References:

- [1] A.M. Baetsen-Young, M. Vasher, L.L. Matta, P. Colgan, E.C. Alocilja, B. Day, Direct colorimetric detection of unamplified pathogen DNA by dextrin-capped gold nanoparticles, *Biosensors and Bioelectronics*, 101(2018) 29-36.
- [2] A.M. Jimenez Jimenez, M.A.M. Rodrigo, V. Milosavljevic, S. Krizkova, P. Kopel, Z. Heger, et al., Gold nanoparticles-modified nanomaghemite and quantum dots-based hybridization assay for detection of HPV, *Sensors and Actuators B: Chemical*, 240(2017) 503-10.
- [3] P. Teengam, W. Siangproh, A. Tuantranont, T. Vilaivan, O. Chailapakul, C.S. Henry, Multiplex Paper-Based Colorimetric DNA Sensor Using PyrrolidinyI Peptide Nucleic Acid-Induced AgNPs Aggregation for Detecting MERS-CoV, MTB, and HPV Oligonucleotides, *Analytical Chemistry*, 89(2017) 5428-35.
- [4] S. Jampasa, W. Siangproh, R. Laocharoensuk, P. Yanatatsaneejit, T. Vilaivan, O. Chailapakul, A new DNA sensor design for the simultaneous detection of HPV type 16 and 18 DNA, *Sensors and Actuators B: Chemical*, 265(2018) 514-21.
